# Supplementary material
Source: publisher figshare collection journal article supplement (https://karger.figshare.com/ndownloader/files/35675072)
Supplement: Supplementary file 1 [file 35675072]

|  | Ki (ml min-1 ml-1) obtained by PET scans | |
| --- | --- | --- |
| **Remodeling parameters obtained by bone biopsies** | **R** | **P-value** |
| Static resorptive parameter | | |
| Eroded surfaces, % | 0.44 | 0.07 |
| Dynamic resorptive parameter | | |
| Resorption period, days | 0.56 | 0.02* |
| Static formative parameter | | |
| Wall thickness, 𝜇m | 0.12 | 0.35 |
| Dynamic formative parameters | | |
| MAR, 𝜇m/day | 0.58 | 0.02* |
| Formation period, days | 0.61 | 0.01* |

***S Table 2*** *Correlations between values obtained by 18F-NaF PET/CT compared by linear regression with bone biopsy remodeling parameters. Lumbar Ki results are used for correlation from the scan. Correlations are presented by Pearson’s correlation coefficient (R). *Significance level <0.05.*
